# Supplementary material for: Combined preoperative concentrations of CEA, CA 19-9, and 72-4 for predicting outcomes in patients with gastric cancer after curative resection
Source: PubMed Central journal article supplement (PMC5085242; doi:10.18632/oncotarget.9060), 2016-04-27
Supplement: oncotarget-07-35446-s001.pdf [file oncotarget-07-35446-s001.pdf]

**SUPPLEMENTARY FIGURE**

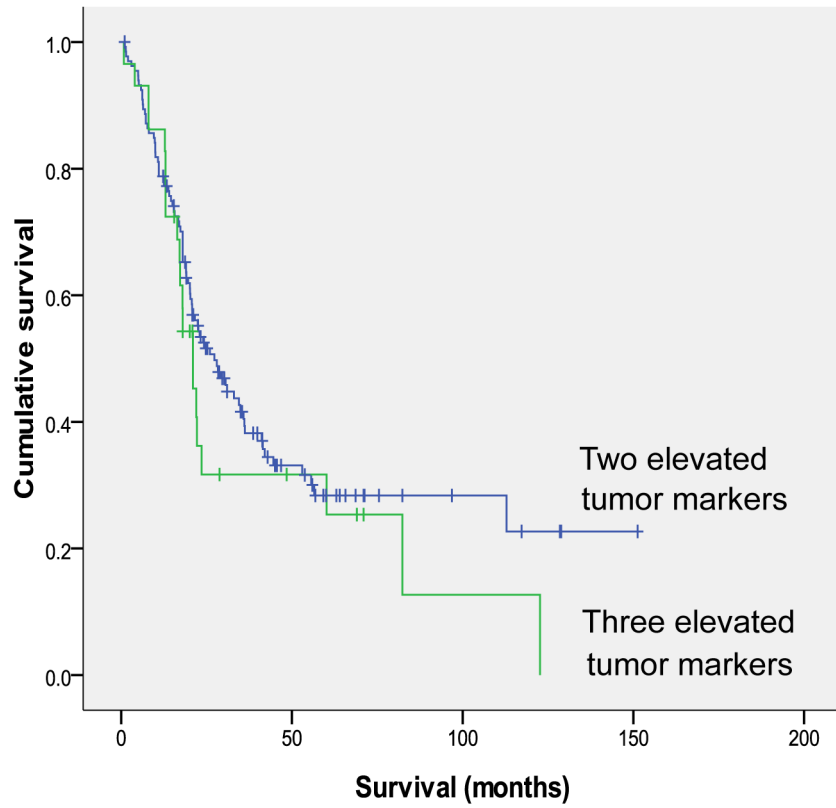

**Supplementary Figure S1: Overall survival based on the number of elevated tumor markers (2 and 3, from top to bottom).**
